# Supplementary material for: Automated on-line solvent extraction and AAS-graphite furnace determination of trace metals in difficult matrices
Source: Royal Society of Chemistry journal article supplement (doi:10.1039/b310142h), 2003-01-01
Supplement: jaas_esi.doc [file jaas_esi.doc]

# This journal is © The Royal Society of Chemistry 2003

# Theoretical considerations on solvent extraction

**The extraction equilibrium of a divalent metal (M) with excess between an aqueous phase (aq) and an organic phase (org) can be described by equation (1) and the matching extraction constants, Kex, see e.g. Bajo and Wyttenbach1**

(1) 2 HDDCorg  + Maq2  M(DDC)2,org + 2 Haq

where Kex = M(DDC)2org H+2aq / M2+ aqHDDC2org

**The system is fully described when introducing equations (2) and (3) describing extraction into 4-Methylpentan-2-one (M**ethyl-isoButyl Ketone, **MIBK) and the acidity of the ligand itself (**Ks**).**

(2) HDDCorg  HDDCaq  with KH,ex = HDDCaq /HDDCorg = 10-2.85

(3) HDDCaq  H+ + DDCaq with Ks = H+aq DDCaq /HDDCaq = 10-3.36

The ratio between DDC complexed metal in the MIBK phase and metal in the aqueous phase is calculated for 10 metals of interest and shown in Table S1 together with the extractions constants (Kex) defined by equation (1). Table S1 further shows the pH at which 1 % of the metal is left in the aqueous phase (the ratio M(DDC)2org /M2+aq = 100).

**Table S1** Theoretical values for extraction equilibriums for metal-DDC’s into MIBK (Data from Bajo and Wyttenbach1)

| Metal | Extraction  Constant Kex | M(DDC)2org /M2+aq  for pH = 0.3 | pH for  M(DDC)2org /M2+aq = 100 |
| --- | --- | --- | --- |
| Mn | 3.8 10-5 | < 10-6 | 5.2 |
| Fe | 1.6 101 | 0.006 | 2.5 |
| Co | 2.1 102 | 0.08 | 1.8 |
| Zn | 9.1 102 | 0.36 | 1.5 |
| Cd | 2.6 105 | 103 | 0.2 |
| Pb | 5.9 107 | 23000 | -0.9 |
| Ag | 3.3 1011 | > 106 | < -2 |
| Ni | 3.8 1011 | > 106 | < -2 |
| Cu | 5.0 1013 | > 106 | < -2 |
| Hg | 8.7 1031 | > 106 | < -2 |

1. **S. Bajo and A. Wyttenbach, *Anal. Chem.*, 1979,** 51**, 376-378.**

Principle of timing of the system

Fig. S1 **Principle of timing of the system. The time period for one sample in replicate injection is approximately 3 min.**

**Extraction and determination of 65Zn in both the organic and aqueous phases as function of pH**

**Fig. S2** Extraction and determination of 65Zn in both the organic and aqueous phases as function of pH.
